# Supplementary material for: Transcriptional analysis of rat piriform cortex following exposure to the organophosphonate anticholinesterase sarin and induction of seizures
Source: J Neuroinflammation. 2011 Jul 21;8:83. doi: 10.1186/1742-2094-8-83 (PMC3199787; doi:10.1186/1742-2094-8-83)
Supplement: Additional file 5 — Top ≤ 800 genes altered at 3 h post-seizure onset (p-value cutoff ≤ 4.66 × 10-3). [file 1742-2094-8-83-S5.XLS]

## Sheet: Sheet0
	Top 800 Significantly Altered Genes at 3 h Post-Seizure Onset used for Gene Ontology Analysis
	Entrez Gene Name	Symbol	p-value	Fold Change
	BTG family, member 2	BTG2	1.24E−08	8.835
	activity-regulated cytoskeleton-associated protein	ARC	6.11E−08	15.382
	ADAM metallopeptidase with thrombospondin type 1 motif, 9	ADAMTS9	6.75E−08	2.362
	F-box protein 33	FBXO33	1.50E−07	11.053
	homer homolog 1 (Drosophila)	HOMER1	1.51E−07	19.286
	heme oxygenase (decycling) 1	HMOX1	2.60E−07	6.017
	regulator of calcineurin 1	RCAN1	4.46E−07	2.203
	early growth response 4	EGR4	4.76E−07	11.187
	Cbp/p300-interacting transactivator, with Glu/Asp-rich carboxy-terminal domain, 2	CITED2	5.39E−07	8.463
	calcitonin-related polypeptide beta	CALCB	5.48E−07	23.886
	growth arrest and DNA-damage-inducible, gamma	GADD45G	5.58E−07	25.439
	CCAAT/enhancer binding protein (C/EBP), delta	CEBPD	5.95E−07	12.383
	nuclear receptor subfamily 4, group A, member 1	NR4A1	6.28E−07	7.935
	parathyroid hormone-like hormone	PTHLH	1.10E−06	1.867
	prostaglandin E synthase	PTGES	1.24E−06	5.342
	protein phosphatase 1, regulatory (inhibitor) subunit 15A	PPP1R15A	1.36E−06	6.507
	dual specificity phosphatase 1	DUSP1	1.83E−06	13.824
	cAMP-regulated phosphoprotein, 19kDa	ARPP19	1.87E−06	2.702
	family with sequence similarity 46, member A	FAM46A	1.93E−06	4.362
	corticotropin releasing hormone	CRH	2.47E−06	19.846
	myeloid cell leukemia sequence 1 (BCL2-related)	MCL1	2.62E−06	2.4
	cyclin D1	CCND1	2.63E−06	1.465
	heat shock protein 90kDa alpha (cytosolic), class A member 1	HSP90AA1	2.70E−06	1.39
	prostaglandin-endoperoxide synthase 2 (prostaglandin G/H synthase and cyclooxygenase)	PTGS2	2.71E−06	8.752
	heat shock 70kDa protein 5 (glucose-regulated protein, 78kDa)	HSPA5	2.92E−06	1.735
	solute carrier family 25 (mitochondrial carrier; phosphate carrier), member 25	SLC25A25	3.11E−06	3.166
	actin-binding Rho activating protein	ABRA	3.51E−06	25.07
	chemokine (C-C motif) ligand 3	CCL3	3.73E−06	40.597
	sprouty homolog 2 (Drosophila)	SPRY2	3.76E−06	3.936
	heat shock 105kDa/110kDa protein 1	HSPH1	4.18E−06	2.221
	ADP-ribosylation factor-like 4A	ARL4A	4.78E−06	4.313
	regulator of G-protein signaling 2, 24kDa	RGS2	4.81E−06	5.18
	synaptotagmin IV	SYT4	4.89E−06	4.019
	jun B proto-oncogene	JUNB	5.52E−06	12.183
	ADAM metallopeptidase with thrombospondin type 1 motif, 1	ADAMTS1	5.68E−06	11.125
	early growth response 2	EGR2	5.86E−06	11.37
		null	6.00E−06	5.542
	myosin, light chain 1, alkali; skeletal, fast	MYL1	6.32E−06	1.728
	B-cell translocation gene 1, anti-proliferative	BTG1	6.36E−06	2.551
	DnaJ (Hsp40) homolog, subfamily B, member 1	DNAJB1	6.77E−06	4.656
	polo-like kinase 2	PLK2	7.35E−06	1.954
	deiodinase, iodothyronine, type II	DIO2	7.55E−06	2.795
	brain-derived neurotrophic factor	BDNF	8.09E−06	10.543
	jun proto-oncogene	JUN	9.01E−06	4.369
	cAMP responsive element modulator	CREM	9.01E−06	7.584
	pleckstrin	PLEK	9.72E−06	2.242
	nuclear factor, interleukin 3 regulated	NFIL3	1.02E−05	8.836
	interleukin-1 receptor-associated kinase 2	IRAK2	1.07E−05	1.823
	solute carrier family 16, member 1 (monocarboxylic acid transporter 1)	SLC16A1	1.08E−05	2.992
	regulator of G-protein signaling 4	RGS4	1.16E−05	2.354
	nuclear factor of kappa light polypeptide gene enhancer in B-cells 1	NFKB1	1.17E−05	2.54
	metallothionein 1F	MT1F	1.26E−05	7.62
	TCDD-inducible poly(ADP-ribose) polymerase	TIPARP	1.29E−05	8.13
	sprouty homolog 1, antagonist of FGF signaling (Drosophila)	SPRY1	1.38E−05	3.111
	serine/arginine-rich splicing factor 2	SRSF2	1.39E−05	1.549
	oxidized low density lipoprotein (lectin-like) receptor 1	OLR1	1.55E−05	37.056
	arginine vasopressin receptor 1A	AVPR1A	1.63E−05	1.617
	proprotein convertase subtilisin/kexin type 1	PCSK1	1.67E−05	5.27
	cystatin B (stefin B)	CSTB	1.68E−05	1.236
	CNKSR family member 3	CNKSR3	1.93E−05	2.214
	Ras homolog enriched in brain	RHEB	1.94E−05	1.618
	dual specificity phosphatase 5	DUSP5	2.07E−05	11.987
	hairy/enhancer-of-split related with YRPW motif 1	HEY1	2.17E−05	−1.707
	A kinase (PRKA) anchor protein 8-like	AKAP8L	2.27E−05	1.58
	nuclear receptor subfamily 4, group A, member 2	NR4A2	2.38E−05	7.357
	coiled-coil-helix-coiled-coil-helix domain containing 2	CHCHD2	2.76E−05	1.145
	neuregulin 1	NRG1	2.76E−05	1.386
	phosphodiesterase 4D, cAMP-specific	PDE4D	2.78E−05	2.368
	secretogranin II	SCG2	2.81E−05	4.73
	CTTNBP2 N-terminal like	CTTNBP2NL	2.82E−05	1.542
	ERBB receptor feedback inhibitor 1	ERRFI1	2.82E−05	2.688
	coilin	COIL	2.83E−05	−1.596
	early growth response 1	EGR1	2.83E−05	3.505
	nuclear receptor subfamily 4, group A, member 3	NR4A3	2.90E−05	11.2
	guanine nucleotide binding protein (G protein), alpha inhibiting activity polypeptide 3	GNAI3	2.99E−05	1.511
	5-hydroxytryptamine (serotonin) receptor 1D	HTR1D	3.11E−05	−1.189
	ADP-ribosylation factor-like 4D	ARL4D	3.16E−05	12.348
	CHMP family, member 7	CHMP7	3.35E−05	−1.249
	FBJ murine osteosarcoma viral oncogene homolog	FOS	3.45E−05	31.708
	UDP-glucose 6-dehydrogenase	UGDH	3.48E−05	1.568
	nuclear import 7 homolog (S. cerevisiae)	NIP7	3.87E−05	3.667
	GTP binding protein overexpressed in skeletal muscle	GEM	3.89E−05	16.758
	TP53 regulating kinase	TP53RK	4.02E−05	6.707
	DPH3, KTI11 homolog (S. cerevisiae)	DPH3	4.07E−05	1.514
	RNA (guanine-9-) methyltransferase domain containing 1	RG9MTD1	4.10E−05	6.685
	abhydrolase domain containing 2	ABHD2	4.14E−05	2.909
	dual specificity phosphatase 6	DUSP6	4.16E−05	4.884
	IMP (inosine 5'-monophosphate) dehydrogenase 2	IMPDH2	4.58E−05	2.469
	tubulin, beta 4	TUBB4	4.68E−05	−1.434
	vacuolar protein sorting 37 homolog B (S. cerevisiae)	VPS37B	5.00E−05	2.065
	bromodomain adjacent to zinc finger domain, 1A	BAZ1A	5.05E−05	3.312
	G protein-coupled receptor 19	GPR19	5.18E−05	4.082
	MAX dimerization protein 1	MXD1	5.50E−05	1.479
	tissue factor pathway inhibitor 2	TFPI2	5.53E−05	7.567
	GTP cyclohydrolase 1	GCH1	5.56E−05	2.457
	lamin B1	LMNB1	5.65E−05	−1.539
	RAB21, member RAS oncogene family	RAB21	5.69E−05	1.475
	zinc finger, AN1-type domain 2A	ZFAND2A	5.80E−05	3.074
	emerin	EMD	5.96E−05	4.672
	legumain	LGMN	6.22E−05	1.609
	cysteine-serine-rich nuclear protein 1	CSRNP1	6.24E−05	5.3
	chromosome 7 open reading frame 27	C7orf27	6.64E−05	−1.629
	TIMP metallopeptidase inhibitor 1	TIMP1	6.85E−05	11.277
	optic atrophy 1 (autosomal dominant)	OPA1	6.91E−05	2.392
	Ras association (RalGDS/AF-6) domain family member 1	RASSF1	6.94E−05	1.769
	leucine rich repeat neuronal 2	LRRN2	6.97E−05	−1.867
	tropomyosin 3	TPM3	6.99E−05	1.372
	CCAAT/enhancer binding protein (C/EBP), beta	CEBPB	7.32E−05	5.306
	homocysteine-inducible, endoplasmic reticulum stress-inducible, ubiquitin-like domain member 1	HERPUD1	7.32E−05	1.507
	interferon regulatory factor 1	IRF1	7.38E−05	2.531
	sorting nexin 18	SNX18	7.66E−05	2.409
	CD93 molecule	CD93	7.77E−05	2.61
	pyruvate dehydrogenase kinase, isozyme 2	PDK2	7.95E−05	−1.335
	transglutaminase 2 (C polypeptide, protein-glutamine-gamma-glutamyltransferase)	TGM2	7.96E−05	2.949
	RAN binding protein 2	RANBP2	8.16E−05	3.835
	chloride intracellular channel 1	CLIC1	8.19E−05	2.392
	immediate early response 3	IER3	8.74E−05	4.903
	SRY (sex determining region Y)-box 4	SOX4	8.75E−05	3.926
	ChaC, cation transport regulator homolog 1 (E. coli)	CHAC1	9.09E−05	2.795
	sulfiredoxin 1	SRXN1	9.15E−05	3.406
	uveal autoantigen with coiled-coil domains and ankyrin repeats	UACA	9.27E−05	1.954
	ATPase, Na+/K+ transporting, beta 3 polypeptide	ATP1B3	9.40E−05	1.215
	RNA pseudouridylate synthase domain containing 2	RPUSD2	9.54E−05	−1.926
	NADH dehydrogenase (ubiquinone) 1 alpha subcomplex, 5, 13kDa	NDUFA5	9.64E−05	1.685
	protein phosphatase 4, regulatory subunit 1	PPP4R1	9.89E−05	1.38
	adenylate cyclase activating polypeptide 1 (pituitary)	ADCYAP1	1.04E−04	4.205
	sema domain, transmembrane domain (TM), and cytoplasmic domain, (semaphorin) 6A	SEMA6A	1.05E−04	1.363
	seven in absentia homolog 2 (Drosophila)	SIAH2	1.07E−04	3.148
	Kruppel-like factor 15	KLF15	1.07E−04	−2.094
	tumor necrosis factor, alpha-induced protein 6	TNFAIP6	1.10E−04	13.059
	elongation factor, RNA polymerase II, 2	ELL2	1.11E−04	3.667
	trinucleotide repeat containing 6A	TNRC6A	1.12E−04	1.15
	BCL2-associated athanogene 3	BAG3	1.12E−04	8.565
	forkhead box G1	FOXG1	1.17E−04	1.468
	Fas apoptotic inhibitory molecule	FAIM	1.17E−04	2.282
	ezrin	EZR	1.21E−04	1.777
	MAP/microtubule affinity-regulating kinase 2	MARK2	1.22E−04	−1.173
	zinc finger protein 36, C3H type-like 1	ZFP36L1	1.23E−04	2.788
	SH3-binding domain protein 5-like	SH3BP5L	1.25E−04	−1.241
	tachykinin, precursor 1	TAC1	1.26E−04	6.447
	protein inhibitor of activated STAT, 1	PIAS1	1.27E−04	−1.104
	runt-related transcription factor 1	RUNX1	1.29E−04	1.86
	solute carrier organic anion transporter family, member 1A2	SLCO1A2	1.30E−04	−2.382
	DEAH (Asp-Glu-Ala-Asp/His) box polypeptide 57	DHX57	1.31E−04	−1.537
	doublecortin-like kinase 1	DCLK1	1.32E−04	4.26
	TBP-like 1	TBPL1	1.32E−04	2.189
	interferon regulatory factor 8	IRF8	1.33E−04	7.419
	peroxisomal biogenesis factor 26	PEX26	1.33E−04	−1.188
	coenzyme Q10 homolog B (S. cerevisiae)	COQ10B	1.36E−04	5.23
	CD83 molecule	CD83	1.37E−04	3
	golgi phosphoprotein 3 (coat-protein)	GOLPH3	1.37E−04	1.529
	solute carrier family 1 (glial high affinity glutamate transporter), member 2	SLC1A2	1.38E−04	1.532
	leucine rich repeat containing 8 family, member C	LRRC8C	1.39E−04	1.939
	nucleoporin 93kDa	NUP93	1.39E−04	2.014
	zinc finger protein 45	ZNF45	1.42E−04	−1.234
	protocadherin 10	PCDH10	1.42E−04	4.281
	solute carrier family 25 (mitochondrial carrier; phosphate carrier), member 3	SLC25A3	1.43E−04	1.226
	DNA-damage-inducible transcript 3	DDIT3	1.43E−04	2.694
	Ras association (RalGDS/AF-6) domain family member 4	RASSF4	1.44E−04	1.64
	isopentenyl-diphosphate delta isomerase 1	IDI1	1.48E−04	4.191
	heat shock 27kDa protein 1	HSPB1	1.50E−04	9.41
	adrenomedullin	ADM	1.53E−04	2.971
	neuronal pentraxin II	NPTX2	1.56E−04	2.925
	WD repeat domain 33	WDR33	1.58E−04	−1.262
	solute carrier family 35 (CMP-sialic acid transporter), member A1	SLC35A1	1.59E−04	−1.654
	pellino homolog 1 (Drosophila)	PELI1	1.62E−04	2.822
	neuropeptide Y receptor Y5	NPY5R	1.62E−04	−2.131
	lysine (K)-specific demethylase 5B	KDM5B	1.63E−04	−1.442
	cryptochrome 2 (photolyase-like)	CRY2	1.65E−04	1.797
	potassium voltage-gated channel, shaker-related subfamily, member 5	KCNA5	1.65E−04	−2.244
	polymerase (RNA) III (DNA directed) polypeptide E (80kD)	POLR3E	1.70E−04	−1.371
	cyclin-dependent kinase 2 associated protein 1	CDK2AP1	1.70E−04	1.746
	breast cancer anti-estrogen resistance 3	BCAR3	1.72E−04	2.391
	glutamate receptor, metabotropic 1	GRM1	1.72E−04	−1.592
	Kruppel-like factor 4 (gut)	KLF4	1.75E−04	5.649
	ESF1, nucleolar pre-rRNA processing protein, homolog (S. cerevisiae)	ESF1	1.75E−04	−1.499
	microtubule-associated protein, RP/EB family, member 1	MAPRE1	1.76E−04	1.583
	growth arrest and DNA-damage-inducible, beta	GADD45B	1.78E−04	5.493
	activating transcription factor 4 (tax-responsive enhancer element B67)	ATF4	1.80E−04	1.673
	N(alpha)-acetyltransferase 50, NatE catalytic subunit	NAA50	1.82E−04	1.458
	calpain 10	CAPN10	1.83E−04	−1.198
	catenin (cadherin-associated protein), alpha 1, 102kDa	CTNNA1	1.88E−04	1.236
	ubiquitin-conjugating enzyme E2A (RAD6 homolog)	UBE2A	1.92E−04	1.164
	heat shock 22kDa protein 8	HSPB8	1.94E−04	1.375
	PR domain containing 2, with ZNF domain	PRDM2	1.97E−04	1.862
	ankyrin repeat and SOCS box-containing 3	ASB3	1.99E−04	−1.219
	chaperonin containing TCP1, subunit 4 (delta)	CCT4	2.03E−04	1.249
	adrenergic, beta-1-, receptor	ADRB1	2.08E−04	2.369
	Rho/Rac guanine nucleotide exchange factor (GEF) 2	ARHGEF2	2.09E−04	−1.519
	occludin	OCLN	2.17E−04	−1.387
	muscleblind-like 2 (Drosophila)	MBNL2	2.22E−04	1.451
	synaptojanin 2 binding protein	SYNJ2BP	2.25E−04	1.291
	CDC42 effector protein (Rho GTPase binding) 3	CDC42EP3	2.27E−04	2.355
	nudE nuclear distribution gene E homolog (A. nidulans)-like 1	NDEL1	2.27E−04	2.141
	heterogeneous nuclear ribonucleoprotein L-like	HNRPLL	2.31E−04	1.707
	insulin induced gene 1	INSIG1	2.32E−04	2.274
	glycoprotein (transmembrane) nmb	GPNMB	2.32E−04	3.541
	calcyclin binding protein	CACYBP	2.40E−04	1.63
	mitogen-activated protein kinase kinase 3	MAP2K3	2.40E−04	2.025
	calcineurin binding protein 1	CABIN1	2.42E−04	−1.419
	erythrocyte membrane protein band 4.9 (dematin)	EPB49	2.50E−04	−1.209
	chromosome 11 open reading frame 68	C11orf68	2.53E−04	−1.307
	numb homolog (Drosophila)	NUMB	2.54E−04	2.986
	cerebellar degeneration-related protein 2, 62kDa	CDR2	2.55E−04	2.216
	lipolysis stimulated lipoprotein receptor	LSR	2.56E−04	1.85
	enolase-phosphatase 1	ENOPH1	2.56E−04	1.066
	G protein-coupled receptor 12	GPR12	2.57E−04	−1.784
	somatostatin receptor 3	SSTR3	2.58E−04	−1.370
	glutamyl-prolyl-tRNA synthetase	EPRS	2.61E−04	2.141
	unc-50 homolog (C. elegans)	UNC50	2.62E−04	−1.261
	ral guanine nucleotide dissociation stimulator-like 1	RGL1	2.64E−04	−1.328
	proteasome (prosome, macropain) subunit, beta type, 2	PSMB2	2.66E−04	1.397
	poly(A) polymerase alpha	PAPOLA	2.67E−04	2.08
	zinc ribbon domain containing 1	ZNRD1	2.68E−04	2.021
	testis derived transcript (3 LIM domains)	TES	2.80E−04	2.507
	family with sequence similarity 107, member B	FAM107B	2.80E−04	2.907
	ubiquitin-conjugating enzyme E2D 3 (UBC4/5 homolog, yeast)	Ube2d3	2.85E−04	1.431
	ribonuclease P/MRP 38kDa subunit	RPP38	2.90E−04	2.579
	chemokine (C-X-C motif) ligand 2	CXCL2	3.03E−04	9.578
	growth arrest and DNA-damage-inducible, alpha	GADD45A	3.04E−04	3.126
	RNA binding motif protein 8A	RBM8A	3.07E−04	1.347
	poliovirus receptor-related 3	PVRL3	3.20E−04	4.397
	family with sequence similarity 82, member A2	FAM82A2	3.23E−04	1.582
	neurogenic differentiation 1	NEUROD1	3.25E−04	−2.158
	NOP2 nucleolar protein homolog (yeast)	NOP2	3.28E−04	−1.199
	ubiquitin specific peptidase 36	USP36	3.35E−04	1.712
	DEAD (Asp-Glu-Ala-Asp) box polypeptide 23	DDX23	3.38E−04	−1.178
	guanylate cyclase 1, soluble, alpha 3	GUCY1A3	3.40E−04	−1.825
	chromosome 9 open reading frame 3	C9orf3	3.43E−04	3.544
	MTOR associated protein, LST8 homolog (S. cerevisiae)	MLST8	3.47E−04	−1.245
	DnaJ (Hsp40) homolog, subfamily A, member 4	DNAJA4	3.50E−04	1.736
	nudix (nucleoside diphosphate linked moiety X)-type motif 4	NUDT4	3.51E−04	1.535
	melanoma antigen family E, 1	MAGEE1	3.53E−04	−1.452
	serine/threonine kinase receptor associated protein	STRAP	3.55E−04	1.237
	purinergic receptor P2Y, G-protein coupled, 12	P2RY12	3.64E−04	−3.657
	four and a half LIM domains 2	FHL2	3.73E−04	1.826
	adaptor-related protein complex 1, gamma 1 subunit	AP1G1	3.75E−04	−1.238
	metallothionein 1E	MT1E	3.77E−04	2.493
	sphingosine kinase 1	SPHK1	3.78E−04	2.037
	glutaminase	GLS	3.82E−04	2.642
	pim-3 oncogene	PIM3	3.82E−04	3.362
	diacylglycerol O-acyltransferase 1	DGAT1	3.90E−04	1.349
	Kruppel-like factor 5 (intestinal)	KLF5	3.98E−04	5.197
	slingshot homolog 1 (Drosophila)	SSH1	4.03E−04	−1.260
	family with sequence similarity 175, member B	FAM175B	4.21E−04	−1.210
	nuclear factor (erythroid-derived 2)-like 2	NFE2L2	4.21E−04	2.44
	THO complex 4	THOC4	4.26E−04	2.043
	HIV-1 Tat interactive protein 2, 30kDa	HTATIP2	4.31E−04	1.386
	tropomyosin 4	TPM4	4.32E−04	2.237
	adenosine A3 receptor	ADORA3	4.39E−04	−1.490
	moesin	MSN	4.41E−04	2.092
	G-protein signaling modulator 2	GPSM2	4.46E−04	−1.185
	protocadherin 8	PCDH8	4.50E−04	3.328
	endothelial cell adhesion molecule	ESAM	4.61E−04	1.527
	DEAH (Asp-Glu-Ala-His) box polypeptide 8	DHX8	4.62E−04	−1.481
	CD86 molecule	CD86	4.73E−04	1.432
	YTH domain containing 1	YTHDC1	4.76E−04	1.663
	family with sequence similarity 108, member C1	FAM108C1	4.77E−04	−1.291
	glucosaminyl (N-acetyl) transferase 1, core 2	GCNT1	4.80E−04	−1.445
	thyrotrophic embryonic factor	TEF	4.82E−04	−1.325
	protocadherin 20	PCDH20	4.82E−04	1.759
	par-6 partitioning defective 6 homolog alpha (C. elegans)	PARD6A	4.85E−04	1.603
	myeloid/lymphoid or mixed-lineage leukemia 5 (trithorax homolog, Drosophila)	MLL5	4.88E−04	−1.270
	A kinase (PRKA) anchor protein 12	AKAP12	4.88E−04	2.093
	eukaryotic elongation factor-2 kinase	EEF2K	4.88E−04	−1.267
	ATG16 autophagy related 16-like 1 (S. cerevisiae)	ATG16L1	4.89E−04	2.037
	cytoglobin	CYGB	4.96E−04	−1.237
	ras homolog gene family, member C	RHOC	5.00E−04	1.532
	deformed epidermal autoregulatory factor 1 (Drosophila)	DEAF1	5.05E−04	−1.352
	lipocalin 2	LCN2	5.14E−04	2.76
	neural precursor cell expressed, developmentally down-regulated 9	NEDD9	5.18E−04	2.81
	protein phosphatase, Mg2+/Mn2+ dependent, 1B	PPM1B	5.26E−04	1.29
	plasminogen activator, tissue	PLAT	5.29E−04	2.305
	phospholipase A2, group XIIA	PLA2G12A	5.29E−04	1.073
	cAMP-regulated phosphoprotein, 21kDa	ARPP21	5.29E−04	1.735
	mitogen-activated protein kinase 8	MAPK8	5.29E−04	1.322
	RNA binding motif protein 4B	RBM4B	5.31E−04	1.446
	purine-rich element binding protein B	PURB	5.37E−04	2.04
	ubiquitin associated protein 1	UBAP1	5.37E−04	1.281
	CP110 protein	CP110	5.39E−04	−1.378
	metastasis suppressor 1	MTSS1	5.42E−04	−1.282
	interleukin 4 receptor	IL4R	5.46E−04	1.518
	inositol 1,4,5-trisphosphate 3-kinase C	ITPKC	5.59E−04	1.425
	lamin A/C	LMNA	5.60E−04	1.681
	leucine rich repeat (in FLII) interacting protein 1	LRRFIP1	5.65E−04	2.157
	translocase of inner mitochondrial membrane 44 homolog (yeast)	TIMM44	5.70E−04	−1.301
	serine/arginine-rich splicing factor 9	SRSF9	5.70E−04	1.619
	period homolog 1 (Drosophila)	PER1	5.73E−04	1.918
	ELOVL family member 5, elongation of long chain fatty acids (FEN1/Elo2, SUR4/Elo3-like, yeast)	ELOVL5	5.74E−04	2.493
	tubulin, beta 6	TUBB6	5.77E−04	3.814
	limbic system-associated membrane protein	LSAMP	5.80E−04	1.395
	epithelial membrane protein 1	EMP1	5.80E−04	6.227
	serum response factor (c-fos serum response element-binding transcription factor)	SRF	5.91E−04	1.61
	3-hydroxy-3-methylglutaryl-CoA reductase	HMGCR	5.91E−04	2.01
	baculoviral IAP repeat-containing 2	BIRC2	5.93E−04	1.371
	jumping translocation breakpoint	JTB	5.95E−04	1.277
	Bloom syndrome, RecQ helicase-like	BLM	6.05E−04	−1.209
	pleckstrin homology domain containing, family O member 1	PLEKHO1	6.09E−04	2.039
	TGF-beta activated kinase 1/MAP3K7 binding protein 1	TAB1	6.17E−04	−1.505
	serine palmitoyltransferase, long chain base subunit 1	SPTLC1	6.21E−04	−1.117
	necdin-like 2	NDNL2	6.29E−04	2.683
	solute carrier family 17 (anion/sugar transporter), member 5	SLC17A5	6.49E−04	−1.628
	fms-related tyrosine kinase 1 (vascular endothelial growth factor/vascular permeability factor receptor)	FLT1	6.50E−04	1.729
	family with sequence similarity 115, member A	FAM115A	6.68E−04	−1.274
	septin 9	SEPT9	6.70E−04	−1.477
	SH3 domain binding glutamic acid-rich protein like 2	SH3BGRL2	6.72E−04	1.569
	opiate receptor-like 1	OPRL1	6.72E−04	−2.343
	nemo-like kinase	NLK	6.88E−04	−1.144
	Purkinje cell protein 4 like 1	PCP4L1	6.94E−04	1.436
	serine/threonine kinase 40	STK40	6.95E−04	2.092
	opsin 3	OPN3	6.98E−04	3.23
	ER degradation enhancer, mannosidase alpha-like 2	EDEM2	6.98E−04	−1.431
	cysteine and histidine-rich domain (CHORD)-containing 1	CHORDC1	6.99E−04	1.828
	DnaJ (Hsp40) homolog, subfamily B, member 11	DNAJB11	7.02E−04	1.44
	phosphodiesterase 4A, cAMP-specific	PDE4A	7.11E−04	−1.470
	RWD domain containing 4	RWDD4	7.13E−04	1.493
	activator of basal transcription 1	ABT1	7.30E−04	1.354
	ATP synthase, H+ transporting, mitochondrial Fo complex, subunit G	ATP5L	7.33E−04	1.145
	vascular endothelial zinc finger 1	VEZF1	7.38E−04	1.78
	protein tyrosine phosphatase, non-receptor type 12	PTPN12	7.40E−04	1.698
	sphingomyelin phosphodiesterase, acid-like 3B	SMPDL3B	7.44E−04	−1.363
	chromosome 20 open reading frame 24	C20orf24	7.46E−04	1.274
	tripartite motif-containing 9	TRIM9	7.51E−04	2.086
	pumilio homolog 1 (Drosophila)	PUM1	7.57E−04	−1.387
	chromosome 16 open reading frame 80	C16orf80	7.62E−04	1.575
	forkhead box K1	FOXK1	7.67E−04	−1.479
	SERTA domain containing 2	SERTAD2	7.71E−04	1.853
	CCAAT/enhancer binding protein (C/EBP), zeta	CEBPZ	7.72E−04	1.395
	Mdm2 p53 binding protein homolog (mouse)	MDM2	7.75E−04	1.272
	splicing factor 1	SF1	7.78E−04	1.506
	UDP-Gal:betaGlcNAc beta 1,4- galactosyltransferase, polypeptide 6	B4GALT6	7.82E−04	−1.149
	annexin A11	ANXA11	7.85E−04	−1.586
	signal transducer and activator of transcription 3 (acute-phase response factor)	STAT3	7.89E−04	1.649
	protein tyrosine phosphatase type IVA, member 1	PTP4A1	7.92E−04	2.181
	v-yes-1 Yamaguchi sarcoma viral related oncogene homolog	LYN	8.00E−04	1.963
	B-cell CLL/lymphoma 11A (zinc finger protein)	BCL11A	8.06E−04	−1.332
	secreted phosphoprotein 1	SPP1	8.11E−04	9.312
	methyl-CpG binding domain protein 2	MBD2	8.17E−04	1.333
	tubulin, gamma complex associated protein 6	TUBGCP6	8.19E−04	−1.326
	RRS1 ribosome biogenesis regulator homolog (S. cerevisiae)	RRS1	8.20E−04	−1.418
	ubiquitin specific peptidase 30	USP30	8.21E−04	−1.313
	FLT3-interacting zinc finger 1	FIZ1	8.22E−04	−1.284
	zinc finger protein 8	ZNF8	8.28E−04	−1.536
	cell division cycle associated 4	CDCA4	8.28E−04	−1.194
	DEAD (Asp-Glu-Ala-Asp) box polypeptide 50	DDX50	8.29E−04	1.347
	ariadne homolog, ubiquitin-conjugating enzyme E2 binding protein, 1 (Drosophila)	ARIH1	8.30E−04	4.103
	tribbles homolog 1 (Drosophila)	TRIB1	8.33E−04	4.451
	structural maintenance of chromosomes 3	SMC3	8.35E−04	−1.278
	aquaporin 4	AQP4	8.37E−04	−1.138
	ATP-binding cassette, sub-family C (CFTR/MRP), member 5	ABCC5	8.37E−04	1.22
	kinesin family member 3B	KIF3B	8.40E−04	−1.310
	K(lysine) acetyltransferase 2B	KAT2B	8.41E−04	1.664
	centrosomal protein 57kDa	CEP57	8.58E−04	1.674
	ankyrin repeat domain 49	ANKRD49	8.69E−04	−2.625
	family with sequence similarity 110, member B	FAM110B	8.71E−04	−1.385
	proline-rich coiled-coil 2C	PRRC2C	8.71E−04	1.575
	Kv channel interacting protein 1	KCNIP1	8.74E−04	−1.292
	Ras and Rab interactor 2	RIN2	8.79E−04	1.556
	actin binding LIM protein family, member 2	ABLIM2	8.80E−04	−1.191
	ATP-binding cassette, sub-family G (WHITE), member 2	ABCG2	8.85E−04	−1.745
	VGF nerve growth factor inducible	VGF	8.88E−04	1.527
	family with sequence similarity 179, member B	FAM179B	8.91E−04	−1.268
	zinc finger, DHHC-type containing 2	ZDHHC2	8.95E−04	1.334
	ubiquitin C	UBC	8.97E−04	1.412
	zinc finger protein 518A	ZNF518A	9.02E−04	−1.792
	solute carrier family 7 (cationic amino acid transporter, y+ system), member 4	SLC7A4	9.05E−04	−1.758
	splicing factor 3b, subunit 1, 155kDa	SF3B1	9.07E−04	1.409
	intraflagellar transport 20 homolog (Chlamydomonas)	IFT20	9.10E−04	1.32
	collagen, type IV, alpha 1	COL4A1	9.23E−04	2.293
	Nipped-B homolog (Drosophila)	NIPBL	9.27E−04	1.213
	chromosome X open reading frame 56	CXorf56	9.37E−04	3.625
	ring finger and WD repeat domain 3	RFWD3	9.40E−04	−1.434
	sema domain, immunoglobulin domain (Ig), transmembrane domain (TM) and short cytoplasmic domain, (semaphorin) 4G	SEMA4G	9.41E−04	−1.285
	rearranged L-myc fusion	RLF	9.41E−04	2.288
	Morf4 family associated protein 1-like 1	MRFAP1L1	9.44E−04	1.076
	phosphatase and tensin homolog	PTEN	9.47E−04	1.368
	ATP-binding cassette, sub-family G (WHITE), member 1	ABCG1	9.50E−04	−1.279
	CD63 molecule	CD63	9.60E−04	1.562
	KIAA1967	KIAA1967	9.61E−04	−1.340
	mannosyl-oligosaccharide glucosidase	MOGS	9.62E−04	−1.783
	zinc finger protein 281	ZNF281	9.74E−04	1.809
	SMAD family member 1	SMAD1	9.75E−04	1.905
	transmembrane protein 66	TMEM66	9.75E−04	1.216
	v-ets erythroblastosis virus E26 oncogene homolog 1 (avian)	ETS1	9.84E−04	2.31
	tripartite motif-containing 32	TRIM32	9.88E−04	−1.397
	transcriptional regulating factor 1	TRERF1	9.88E−04	−1.423
	guanine nucleotide binding protein (G protein), gamma 5	GNG5	9.92E−04	1.382
	potassium channel tetramerisation domain containing 5	KCTD5	1.00E−03	−1.420
	chromosome 1 open reading frame 128	C1orf128	1.00E−03	1.509
	prepronociceptin	PNOC	1.00E−03	1.805
	solute carrier family 7 (cationic amino acid transporter, y+ system), member 1	SLC7A1	1.02E−03	1.284
	transmembrane protein 101	TMEM101	1.02E−03	−1.188
	LIM domain 7	LMO7	1.03E−03	1.63
	mitogen-activated protein kinase 3	MAPK3	1.03E−03	−1.317
	membrane protein, palmitoylated 3 (MAGUK p55 subfamily member 3)	MPP3	1.03E−03	−1.663
	golgin, RAB6-interacting	GORAB	1.03E−03	2.151
	UDP-glucose pyrophosphorylase 2	UGP2	1.03E−03	1.199
	kelch repeat and BTB (POZ) domain containing 4	KBTBD4	1.04E−03	−1.396
	ankyrin repeat domain 12	ANKRD12	1.04E−03	−1.804
	thrombomodulin	THBD	1.04E−03	3.012
	TBC1 domain family, member 9 (with GRAM domain)	TBC1D9	1.05E−03	2.148
	protein kinase (cAMP-dependent, catalytic) inhibitor beta	PKIB	1.05E−03	2.11
	peroxisomal biogenesis factor 13	PEX13	1.05E−03	2.34
	myelin-associated oligodendrocyte basic protein	MOBP	1.06E−03	2.425
	interferon induced transmembrane protein 3 (1-8U)	IFITM3	1.06E−03	2.278
	tropomyosin 1 (alpha)	TPM1	1.07E−03	2.319
	RAR-related orphan receptor B	RORB	1.07E−03	1.878
	crystallin, alpha B	CRYAB	1.08E−03	2.409
	ADP-ribosylation factor 6	ARF6	1.08E−03	1.368
	protein tyrosine phosphatase-like (proline instead of catalytic arginine), member A	PTPLA	1.08E−03	1.541
	splicing factor proline/glutamine-rich	SFPQ	1.09E−03	1.344
	natriuretic peptide C	NPPC	1.10E−03	1.362
	poliovirus receptor	PVR	1.11E−03	4.629
	SMEK homolog 1, suppressor of mek1 (Dictyostelium)	SMEK1	1.12E−03	1.88
	ubiquitin specific peptidase like 1	USPL1	1.13E−03	1.71
	stromal cell-derived factor 2-like 1	SDF2L1	1.13E−03	1.337
	ELAV (embryonic lethal, abnormal vision, Drosophila)-like 1 (Hu antigen R)	ELAVL1	1.15E−03	1.724
	copine VI (neuronal)	CPNE6	1.16E−03	−1.235
	KDEL (Lys-Asp-Glu-Leu) endoplasmic reticulum protein retention receptor 3	KDELR3	1.16E−03	1.671
	immediate early response 5	IER5	1.17E−03	2.075
	glutamate receptor, ionotrophic, AMPA 3	GRIA3	1.17E−03	−1.276
	polycomb group ring finger 2	PCGF2	1.17E−03	−1.429
	McKusick-Kaufman syndrome	MKKS	1.18E−03	−1.184
	T-cell lymphoma invasion and metastasis 1	TIAM1	1.18E−03	−1.645
	activity-dependent neuroprotector homeobox	ADNP	1.18E−03	−1.538
	doublecortin-like kinase 3	DCLK3	1.18E−03	−1.763
	tumor necrosis factor receptor superfamily, member 1A	TNFRSF1A	1.18E−03	2.254
	shroom family member 2	SHROOM2	1.19E−03	−1.163
	vasohibin 1	VASH1	1.20E−03	−1.315
	sterol-C4-methyl oxidase-like	SC4MOL	1.20E−03	1.63
	superoxide dismutase 2, mitochondrial	SOD2	1.21E−03	1.323
	deoxythymidylate kinase (thymidylate kinase)	DTYMK	1.21E−03	1.854
	cadherin, EGF LAG seven-pass G-type receptor 2 (flamingo homolog, Drosophila)	CELSR2	1.22E−03	−1.300
	golgin A5	GOLGA5	1.24E−03	−1.617
	platelet-activating factor receptor	PTAFR	1.24E−03	1.643
	kinase D-interacting substrate, 220kDa	KIDINS220	1.25E−03	−1.208
	RNA binding motif protein 5	RBM5	1.25E−03	−2.472
	nitric oxide synthase 3 (endothelial cell)	NOS3	1.25E−03	2.022
	contactin 4	CNTN4	1.25E−03	−1.337
	leucine rich repeat transmembrane neuronal 1	LRRTM1	1.27E−03	2.162
	nuclear undecaprenyl pyrophosphate synthase 1 homolog (S. cerevisiae)	NUS1	1.27E−03	−1.273
	PPPDE peptidase domain containing 2	PPPDE2	1.27E−03	1.19
	small nuclear ribonucleoprotein polypeptide G	SNRPG	1.28E−03	1.416
	gap junction protein, delta 2, 36kDa	GJD2	1.29E−03	−1.171
	RAP1B, member of RAS oncogene family	RAP1B	1.30E−03	1.67
	interleukin 1 receptor accessory protein	IL1RAP	1.31E−03	2.4
	EH-domain containing 4	EHD4	1.31E−03	1.438
	serum/glucocorticoid regulated kinase 1	SGK1	1.32E−03	1.63
	iron-responsive element binding protein 2	IREB2	1.33E−03	−1.560
	arachidonate 5-lipoxygenase-activating protein	ALOX5AP	1.33E−03	−1.199
	GRIP and coiled-coil domain containing 2	GCC2	1.33E−03	−1.498
	retinoic acid induced 14	RAI14	1.34E−03	1.682
	centromere protein V	CENPV	1.34E−03	1.364
	ankyrin repeat and SOCS box-containing 6	ASB6	1.34E−03	−1.403
	delta-like 4 (Drosophila)	DLL4	1.35E−03	1.126
	DIM1 dimethyladenosine transferase 1-like (S. cerevisiae)	DIMT1L	1.36E−03	1.43
	DiGeorge syndrome critical region gene 6	DGCR6	1.37E−03	1.371
	zinc finger, MYM-type 2	ZMYM2	1.37E−03	−1.314
	glycogen synthase 1 (muscle)	GYS1	1.37E−03	−1.327
	Cbp/p300-interacting transactivator, with Glu/Asp-rich carboxy-terminal domain, 1	CITED1	1.37E−03	1.332
	nicotinamide phosphoribosyltransferase	NAMPT	1.37E−03	1.892
	protein C receptor, endothelial	PROCR	1.39E−03	5.301
	tumor protein, translationally-controlled 1	TPT1	1.40E−03	1.293
	fibroblast growth factor receptor 2	FGFR2	1.41E−03	1.423
	mediator complex subunit 16	MED16	1.41E−03	−1.194
	SH2B adaptor protein 2	SH2B2	1.42E−03	1.836
	solute carrier family 25, member 28	SLC25A28	1.42E−03	1.643
	tumor necrosis factor receptor superfamily, member 11b	TNFRSF11B	1.44E−03	2.185
	PDZ and LIM domain 7 (enigma)	PDLIM7	1.44E−03	1.768
	StAR-related lipid transfer (START) domain containing 8	STARD8	1.44E−03	−1.441
	polypyrimidine tract binding protein 1	PTBP1	1.44E−03	1.631
	vascular cell adhesion molecule 1	VCAM1	1.45E−03	1.315
	chromosome 5 open reading frame 22	C5orf22	1.47E−03	−1.335
	CDGSH iron sulfur domain 2	CISD2	1.47E−03	1.56
	interferon (alpha, beta and omega) receptor 1	IFNAR1	1.47E−03	−1.313
	interleukin-1 receptor-associated kinase 1 binding protein 1	IRAK1BP1	1.47E−03	1.284
	BAI1-associated protein 2	BAIAP2	1.47E−03	2.082
	NHP2 non-histone chromosome protein 2-like 1 (S. cerevisiae)	NHP2L1	1.47E−03	1.512
	Ras protein-specific guanine nucleotide-releasing factor 1	RASGRF1	1.47E−03	3.484
	chondroitin sulfate synthase 1	CHSY1	1.48E−03	1.76
	NGFI-A binding protein 1 (EGR1 binding protein 1)	NAB1	1.48E−03	1.72
	laminin, gamma 1 (formerly LAMB2)	LAMC1	1.48E−03	1.448
	mitogen-activated protein kinase-activated protein kinase 2	MAPKAPK2	1.48E−03	1.226
	serglycin	SRGN	1.49E−03	1.501
	KIAA1468	KIAA1468	1.49E−03	−1.538
	SNF2 histone linker PHD RING helicase	SHPRH	1.49E−03	−1.578
	sperm associated antigen 9	SPAG9	1.50E−03	3.023
	pumilio homolog 2 (Drosophila)	PUM2	1.51E−03	−1.240
	dual specificity phosphatase 4	DUSP4	1.52E−03	2.44
	RGM domain family, member A	RGMA	1.52E−03	−1.416
	zinc finger protein 287	ZNF287	1.52E−03	−2.062
	reticulon 4 receptor	RTN4R	1.53E−03	−1.663
	cyclin M3	CNNM3	1.53E−03	−1.216
	PHD finger protein 17	PHF17	1.57E−03	−1.287
	high-mobility group nucleosome binding domain 1	HMGN1	1.58E−03	1.227
	NEDD4 binding protein 1	N4BP1	1.58E−03	1.525
	Hermansky-Pudlak syndrome 3	HPS3	1.59E−03	−1.531
	family with sequence similarity 195, member A	FAM195A	1.59E−03	1.239
	CD14 molecule	CD14	1.60E−03	2.928
	calcium binding protein 39-like	CAB39L	1.61E−03	1.358
	ankyrin repeat and SOCS box-containing 8	ASB8	1.63E−03	−1.379
	zinc finger protein 57 homolog (mouse)	ZFP57	1.63E−03	−1.529
	regulator of calcineurin 2	RCAN2	1.64E−03	1.806
	proteasome (prosome, macropain) assembly chaperone 2	PSMG2	1.66E−03	−1.144
	lymphocyte antigen 6 complex, locus E	LY6E	1.66E−03	−1.426
	pantothenate kinase 4	PANK4	1.66E−03	−1.503
	nuclear factor of kappa light polypeptide gene enhancer in B-cells inhibitor, alpha	NFKBIA	1.67E−03	2.715
	WD repeat domain 48	WDR48	1.67E−03	−1.419
	calcium channel, voltage-dependent, beta 3 subunit	CACNB3	1.69E−03	−1.259
	AT rich interactive domain 1A (SWI-like)	ARID1A	1.69E−03	−1.168
	low density lipoprotein receptor-related protein associated protein 1	LRPAP1	1.71E−03	−1.087
	abhydrolase domain containing 6	ABHD6	1.72E−03	−1.521
	unc-51-like kinase 2 (C. elegans)	ULK2	1.73E−03	−1.271
	heat shock 70kDa protein 12A	HSPA12A	1.74E−03	−1.393
	protein tyrosine phosphatase type IVA, member 3	PTP4A3	1.74E−03	−1.429
	bromodomain containing 8	BRD8	1.75E−03	−1.457
	asparagine-linked glycosylation 2, alpha-1,3-mannosyltransferase homolog (S. cerevisiae)	ALG2	1.75E−03	−1.166
	zinc finger protein 467	ZNF467	1.75E−03	−1.543
	stress-associated endoplasmic reticulum protein 1	SERP1	1.76E−03	1.663
	fucosyltransferase 8 (alpha (1,6) fucosyltransferase)	FUT8	1.76E−03	−1.322
	calcium/calmodulin-dependent protein kinase II alpha	CAMK2A	1.78E−03	−2.646
	SMAD specific E3 ubiquitin protein ligase 2	SMURF2	1.79E−03	2.307
	guanine monphosphate synthetase	GMPS	1.80E−03	1.645
	stomatin	STOM	1.81E−03	1.254
	SWI/SNF related, matrix associated, actin dependent regulator of chromatin, subfamily d, member 2	SMARCD2	1.83E−03	−1.574
	chromosome 19 open reading frame 2	C19orf2	1.83E−03	1.477
	CASP8 and FADD-like apoptosis regulator	CFLAR	1.83E−03	1.21
	secretogranin III	SCG3	1.85E−03	1.171
	insulin-like growth factor 1 (somatomedin C)	IGF1	1.86E−03	1.734
	regulator of chromosome condensation 2	RCC2	1.90E−03	1.125
	armadillo repeat containing, X-linked 3	ARMCX3	1.90E−03	1.369
	lectin, galactoside-binding, soluble, 3	LGALS3	1.91E−03	2.401
	solute carrier family 30 (zinc transporter), member 3	SLC30A3	1.92E−03	−1.268
	paralemmin	PALM	1.94E−03	−1.165
	midnolin	MIDN	1.94E−03	1.907
	exostoses (multiple)-like 2	EXTL2	1.97E−03	−1.414
	regulator of G-protein signaling 7 binding protein	RGS7BP	1.98E−03	2.496
	armadillo repeat containing 1	ARMC1	1.99E−03	−1.123
	G patch domain and ankyrin repeats 1	GPANK1	2.00E−03	−1.302
	RWD domain containing 3	RWDD3	2.00E−03	−1.783
	heat shock transcription factor 2	HSF2	2.01E−03	1.35
	protein kinase, AMP-activated, gamma 2 non-catalytic subunit	PRKAG2	2.01E−03	−1.290
	misshapen-like kinase 1	MINK1	2.01E−03	−1.190
	heparan sulfate (glucosamine) 3-O-sulfotransferase 1	HS3ST1	2.02E−03	1.465
	SEC11 homolog C (S. cerevisiae)	SEC11C	2.02E−03	1.127
	acyl-CoA dehydrogenase family, member 9	ACAD9	2.05E−03	1.618
	NFKB repressing factor	NKRF	2.06E−03	1.678
	AT rich interactive domain 5B (MRF1-like)	ARID5B	2.06E−03	2.708
	MYB binding protein (P160) 1a	MYBBP1A	2.07E−03	−1.218
	ring finger protein 26	RNF26	2.08E−03	−1.277
	eukaryotic translation initiation factor 6	EIF6	2.08E−03	1.212
	chondroitin polymerizing factor 2	CHPF2	2.09E−03	−1.538
	golgi phosphoprotein 3-like	GOLPH3L	2.09E−03	−1.343
	peptidylprolyl isomerase D	PPID	2.10E−03	1.543
	LUC7-like 3 (S. cerevisiae)	LUC7L3	2.12E−03	1.549
	tweety homolog 3 (Drosophila)	TTYH3	2.13E−03	−1.282
	hydroxysteroid dehydrogenase like 2	HSDL2	2.14E−03	1.396
	striatin, calmodulin binding protein 4	STRN4	2.19E−03	−1.212
	synaptophysin	SYP	2.19E−03	−1.217
	chromatin modifying protein 1B	CHMP1B	2.19E−03	2.231
	ATP synthase mitochondrial F1 complex assembly factor 1	ATPAF1	2.20E−03	−1.366
	lectin, galactoside-binding, soluble, 9B	LGALS9B	2.21E−03	−1.627
	nuclear transcription factor Y, beta	NFYB	2.21E−03	2.01
	ADP-ribosylation factor 4	ARF4	2.23E−03	1.678
	lin-37 homolog (C. elegans)	LIN37	2.23E−03	−1.233
	ral guanine nucleotide dissociation stimulator	RALGDS	2.23E−03	−1.278
	cryptochrome 1 (photolyase-like)	CRY1	2.24E−03	2.042
	cytochrome P450, family 51, subfamily A, polypeptide 1	CYP51A1	2.26E−03	1.672
	TYRO protein tyrosine kinase binding protein	TYROBP	2.27E−03	1.507
	cytochrome c oxidase subunit VIa polypeptide 1	COX6A1	2.27E−03	1.102
	BCL2/adenovirus E1B 19kDa interacting protein 1	BNIP1	2.28E−03	−1.206
	major histocompatibility complex, class II, DM beta	HLA-DMB	2.28E−03	−1.613
	retinaldehyde binding protein 1	RLBP1	2.28E−03	1.18
	cullin 7	CUL7	2.29E−03	−1.215
	serine/threonine kinase 24	STK24	2.29E−03	−1.199
	cyclin-dependent kinase inhibitor 1A (p21, Cip1)	CDKN1A	2.30E−03	2.589
	CCR4 carbon catabolite repression 4-like (S. cerevisiae)	CCRN4L	2.31E−03	1.647
	leucine rich repeat containing 1	LRRC1	2.32E−03	1.218
	transcription elongation factor B (SIII), polypeptide 3 (110kDa, elongin A)	TCEB3	2.32E−03	−1.164
	polycomb group ring finger 1	PCGF1	2.33E−03	−1.351
	platelet-derived growth factor alpha polypeptide	PDGFA	2.33E−03	1.449
	tubulin, beta 3	TUBB3	2.34E−03	−1.291
	RIO kinase 3 (yeast)	RIOK3	2.36E−03	1.56
	F-box protein 38	FBXO38	2.36E−03	−1.522
	calmodulin-like 4	CALML4	2.39E−03	−1.358
	Shwachman-Bodian-Diamond syndrome	SBDS	2.40E−03	1.376
	ras homolog gene family, member Q	RHOQ	2.40E−03	1.862
	microsomal triglyceride transfer protein	MTTP	2.40E−03	−1.265
	SAR1 homolog A (S. cerevisiae)	SAR1A	2.41E−03	1.333
	ubiquitin specific peptidase 9, X-linked	USP9X	2.41E−03	1.124
	KIT ligand	KITLG	2.41E−03	2.098
	phosphatidylinositol glycan anchor biosynthesis, class O	PIGO	2.43E−03	−1.270
	dual specificity phosphatase 14	DUSP14	2.43E−03	1.43
	family with sequence similarity 120B	FAM120B	2.43E−03	−1.320
	myotubularin related protein 2	MTMR2	2.43E−03	1.439
	DEAD (Asp-Glu-Ala-Asp) box polypeptide 17	DDX17	2.43E−03	1.813
	mevalonate (diphospho) decarboxylase	MVD	2.44E−03	1.796
	phosphatidylinositol 4-kinase type 2 beta	PI4K2B	2.44E−03	1.297
	Zic family member 3 (odd-paired homolog, Drosophila)	ZIC3	2.46E−03	−1.524
	platelet-derived growth factor receptor, alpha polypeptide	PDGFRA	2.47E−03	−1.422
	RNA binding motif protein 27	RBM27	2.47E−03	−1.354
	phospholipid scramblase 3	PLSCR3	2.50E−03	−1.322
	transducin (beta)-like 1 X-linked receptor 1	TBL1XR1	2.51E−03	−1.372
	SMAD family member 7	SMAD7	2.52E−03	1.559
	actin related protein 2/3 complex, subunit 1B, 41kDa	ARPC1B	2.53E−03	1.629
	tetratricopeptide repeat domain 39B	TTC39B	2.53E−03	1.446
	dystroglycan 1 (dystrophin-associated glycoprotein 1)	DAG1	2.53E−03	−1.327
	ring finger protein 166	RNF166	2.53E−03	−1.595
	StAR-related lipid transfer (START) domain containing 4	STARD4	2.54E−03	1.894
	mitogen-activated protein kinase kinase 7	MAP2K7	2.54E−03	−1.460
	adrenergic, alpha-2C-, receptor	ADRA2C	2.59E−03	−1.468
	Der1-like domain family, member 1	DERL1	2.60E−03	−1.334
	tubulin, beta 2C	TUBB2C	2.61E−03	−1.240
	calcium regulated heat stable protein 1, 24kDa	CARHSP1	2.62E−03	1.55
	LSM3 homolog, U6 small nuclear RNA associated (S. cerevisiae)	LSM3	2.62E−03	−1.240
	proliferating cell nuclear antigen	PCNA	2.63E−03	1.785
	pyruvate dehyrogenase phosphatase catalytic subunit 2	PDP2	2.64E−03	1.59
	serum deprivation response	SDPR	2.65E−03	−2.605
	programmed cell death 6 interacting protein	PDCD6IP	2.65E−03	1.269
	transforming growth factor, beta receptor 1	TGFBR1	2.67E−03	2.192
	folliculin	FLCN	2.68E−03	−1.282
	S100 calcium binding protein A9	S100A9	2.68E−03	1.382
	fibronectin leucine rich transmembrane protein 3	FLRT3	2.68E−03	1.909
	RB-associated KRAB zinc finger	RBAK	2.70E−03	−1.358
	chromosome 19 open reading frame 43	C19orf43	2.70E−03	1.195
	zinc finger protein 148	ZNF148	2.70E−03	−1.203
	RAN, member RAS oncogene family	RAN	2.72E−03	1.155
	proenkephalin	PENK	2.72E−03	2.086
	transmembrane protein 85	TMEM85	2.72E−03	1.123
	integrin, beta 1 (fibronectin receptor, beta polypeptide, antigen CD29 includes MDF2, MSK12)	ITGB1	2.73E−03	1.448
	nucleosome assembly protein 1-like 1	NAP1L1	2.74E−03	1.461
	basic helix-loop-helix family, member e41	BHLHE41	2.76E−03	1.438
	exocyst complex component 6	EXOC6	2.78E−03	−1.197
	nuclear receptor binding SET domain protein 1	NSD1	2.78E−03	−1.240
	erythrocyte membrane protein band 4.1-like 3	EPB41L3	2.79E−03	−1.225
	DnaJ (Hsp40) homolog, subfamily C, member 14	DNAJC14	2.80E−03	−1.502
	CTAGE family, member 5	CTAGE5	2.82E−03	1.614
	transmembrane 9 superfamily member 1	TM9SF1	2.82E−03	−1.256
	thioredoxin-like 1	TXNL1	2.82E−03	1.87
	YY1 associated factor 2	YAF2	2.83E−03	1.338
	microtubule-associated protein 1A	MAP1A	2.84E−03	−1.331
	peripheral myelin protein 22	PMP22	2.84E−03	1.427
	survival motor neuron domain containing 1	SMNDC1	2.85E−03	1.194
	RAB11B, member RAS oncogene family	RAB11B	2.87E−03	−1.144
	WD repeat domain 44	WDR44	2.88E−03	−1.812
	BCL2-associated athanogene	BAG1	2.89E−03	1.287
	eukaryotic translation initiation factor 3, subunit H	EIF3H	2.89E−03	1.266
	AT rich interactive domain 2 (ARID, RFX-like)	ARID2	2.90E−03	−1.354
	arachidonate 5-lipoxygenase	ALOX5	2.91E−03	−1.132
	chromodomain helicase DNA binding protein 8	CHD8	2.92E−03	−1.501
	cyclin H	CCNH	2.92E−03	1.387
	homeodomain interacting protein kinase 3	HIPK3	2.93E−03	1.254
	multiple endocrine neoplasia I	MEN1	2.94E−03	−1.459
	neurotrophin 3	NTF3	2.95E−03	−1.387
	immunoglobulin superfamily, DCC subclass, member 3	IGDCC3	2.95E−03	−1.404
	chloride channel 3	CLCN3	2.96E−03	1.369
	ubiquitin-like modifier activating enzyme 3	UBA3	2.98E−03	−1.242
	prominin 1	PROM1	2.98E−03	−1.780
	RAN binding protein 10	RANBP10	2.99E−03	−1.255
	phosphatidylinositol-5-phosphate 4-kinase, type II, alpha	PIP4K2A	3.00E−03	1.279
	golgi membrane protein 1	GOLM1	3.00E−03	−2.378
	membrane protein, palmitoylated 6 (MAGUK p55 subfamily member 6)	MPP6	3.00E−03	1.32
	non-SMC condensin II complex, subunit D3	NCAPD3	3.00E−03	−1.401
	torsin family 2, member A	TOR2A	3.01E−03	−1.178
	adaptor-related protein complex 4, beta 1 subunit	AP4B1	3.01E−03	−1.269
	choline kinase alpha	CHKA	3.02E−03	2.159
	vestigial like 4 (Drosophila)	VGLL4	3.03E−03	1.53
	tumor necrosis factor	TNF	3.04E−03	5.82
	calpain 7	CAPN7	3.05E−03	−1.319
	complement component 1, q subcomponent-like 3	C1QL3	3.05E−03	1.442
	cholecystokinin	CCK	3.09E−03	1.203
	CD82 molecule	CD82	3.10E−03	1.281
	chemokine (C-C motif) ligand 7	CCL7	3.11E−03	2.736
	neurexophilin 1	NXPH1	3.11E−03	−1.567
	nardilysin (N-arginine dibasic convertase)	NRD1	3.16E−03	1.679
	inhibitor of growth family, member 2	ING2	3.17E−03	1.642
	ciliary neurotrophic factor	CNTF	3.19E−03	1.414
	T-cell acute lymphocytic leukemia 1	TAL1	3.19E−03	1.796
	ribosomal protein L8	RPL8	3.22E−03	1.219
	Ral GEF with PH domain and SH3 binding motif 2	RALGPS2	3.23E−03	−1.367
	mediator of DNA-damage checkpoint 1	MDC1	3.24E−03	−1.260
	PTK2 protein tyrosine kinase 2	PTK2	3.26E−03	−1.227
	cannabinoid receptor 2 (macrophage)	CNR2	3.29E−03	−1.155
	RNA binding motif, single stranded interacting protein 1	RBMS1	3.29E−03	1.995
	RAB3D, member RAS oncogene family	RAB3D	3.29E−03	−1.537
	PHD finger protein 12	PHF12	3.30E−03	−1.450
	growth arrest-specific 6	GAS6	3.32E−03	−1.270
	NAD(P) dependent steroid dehydrogenase-like	NSDHL	3.35E−03	1.179
	SAM and SH3 domain containing 3	SASH3	3.35E−03	−1.154
	ubiquitin-conjugating enzyme E2, J1 (UBC6 homolog, yeast)	UBE2J1	3.36E−03	1.369
	TAF11 RNA polymerase II, TATA box binding protein (TBP)-associated factor, 28kDa	TAF11	3.38E−03	1.348
	pantothenate kinase 1	PANK1	3.40E−03	2.698
	required for meiotic nuclear division 5 homolog B (S. cerevisiae)	RMND5B	3.41E−03	−1.566
	mediator complex subunit 1	MED1	3.42E−03	−1.325
	mannosidase, alpha, class 2A, member 1	MAN2A1	3.43E−03	2.135
	plexin D1	PLXND1	3.43E−03	−1.746
	apoptosis antagonizing transcription factor	AATF	3.49E−03	1.276
	metadherin	MTDH	3.52E−03	1.603
	chromosome 12 open reading frame 11	C12orf11	3.53E−03	1.377
	trafficking protein particle complex 5	TRAPPC5	3.53E−03	−1.188
	sodium channel modifier 1	SCNM1	3.54E−03	−1.309
	histone cluster 1, H2bb	HIST1H2BB	3.57E−03	1.438
	LUC7-like (S. cerevisiae)	LUC7L	3.58E−03	1.654
	adaptor-related protein complex 4, sigma 1 subunit	AP4S1	3.59E−03	1.278
	chromosome 21 open reading frame 91	C21orf91	3.60E−03	1.277
	processing of precursor 7, ribonuclease P/MRP subunit (S. cerevisiae)	POP7	3.62E−03	−1.536
	CTD (carboxy-terminal domain, RNA polymerase II, polypeptide A) small phosphatase 1	CTDSP1	3.63E−03	−1.203
	RAS p21 protein activator 3	RASA3	3.63E−03	−1.329
	translin-associated factor X	TSNAX	3.64E−03	−1.132
	selenoprotein M	SELM	3.65E−03	1.194
	serine/arginine-rich splicing factor 1	SRSF1	3.66E−03	1.302
	death-associated protein kinase 1	DAPK1	3.68E−03	−1.591
	tripartite motif-containing 35	TRIM35	3.69E−03	−1.223
	ornithine decarboxylase 1	ODC1	3.71E−03	1.396
	tyrosyl-tRNA synthetase	YARS	3.71E−03	1.103
	purinergic receptor P2X, ligand-gated ion channel, 4	P2RX4	3.72E−03	−1.375
	heat shock 10kDa protein 1 (chaperonin 10)	HSPE1	3.75E−03	1.489
	zinc finger, FYVE domain containing 20	ZFYVE20	3.75E−03	−1.288
	heat shock 70kDa protein 9 (mortalin)	HSPA9	3.77E−03	1.433
	gamma-glutamyltransferase 7	GGT7	3.77E−03	−1.234
	cyclin G2	CCNG2	3.77E−03	−1.390
	phosphodiesterase 2A, cGMP-stimulated	PDE2A	3.77E−03	−1.224
	TSC22 domain family, member 4	TSC22D4	3.78E−03	1.446
	neuropeptide Y receptor Y1	NPY1R	3.78E−03	2.206
	transferrin receptor (p90, CD71)	TFRC	3.79E−03	1.304
	microtubule-associated protein 1 light chain 3 alpha	MAP1LC3A	3.82E−03	1.127
	apoptotic chromatin condensation inducer 1	ACIN1	3.83E−03	−1.247
	guanine nucleotide binding protein (G protein), gamma 12	GNG12	3.86E−03	1.329
	gap junction protein, beta 6, 30kDa	GJB6	3.87E−03	−1.532
	activin A receptor, type I	ACVR1	3.87E−03	−1.340
	brain-specific angiogenesis inhibitor 3	BAI3	3.88E−03	−1.488
	serine/arginine-rich splicing factor 11	SRSF11	3.91E−03	1.451
	suppression of tumorigenicity 7	ST7	3.97E−03	1.56
	capping protein (actin filament), gelsolin-like	CAPG	3.99E−03	1.188
	transducer of ERBB2, 1	TOB1	4.00E−03	1.576
	protein phosphatase 2, regulatory subunit B', epsilon isoform	PPP2R5E	4.02E−03	−1.243
	TBC1 domain family, member 8 (with GRAM domain)	TBC1D8	4.02E−03	−1.091
	v-myc myelocytomatosis viral oncogene homolog 1, lung carcinoma derived (avian)	MYCL1	4.03E−03	−2.037
	glutamate receptor, ionotropic, N-methyl D-aspartate 1	GRIN1	4.03E−03	−1.460
	DnaJ (Hsp40) homolog, subfamily C, member 6	DNAJC6	4.06E−03	−1.091
	mitochondrial ribosomal protein S12	MRPS12	4.11E−03	−1.256
	annexin A2	ANXA2	4.13E−03	1.865
	interferon gamma receptor 1	IFNGR1	4.13E−03	−1.988
	torsin family 1, member A (torsin A)	TOR1A	4.13E−03	−1.307
	deoxyribonuclease II, lysosomal	DNASE2	4.14E−03	1.145
	synaptotagmin III	SYT3	4.14E−03	−1.206
	SWI/SNF related, matrix associated, actin dependent regulator of chromatin, subfamily d, member 1	SMARCD1	4.15E−03	−1.255
	membrane-bound transcription factor peptidase, site 1	MBTPS1	4.15E−03	−1.307
	ras homolog gene family, member V	RHOV	4.15E−03	−1.366
	sphingosine-1-phosphate lyase 1	SGPL1	4.16E−03	1.262
	insulin induced gene 2	INSIG2	4.16E−03	1.428
	family with sequence similarity 83, member H	FAM83H	4.18E−03	−1.218
	seizure related 6 homolog (mouse)-like 2	SEZ6L2	4.21E−03	−1.176
	thyrotropin-releasing hormone receptor	TRHR	4.21E−03	−1.156
	kelch-like 26 (Drosophila)	KLHL26	4.22E−03	−1.437
	NADH dehydrogenase (ubiquinone) 1 alpha subcomplex, 2, 8kDa	NDUFA2	4.22E−03	1.082
	interleukin 6 (interferon, beta 2)	IL6	4.24E−03	3.507
	ornithine decarboxylase antizyme 1	OAZ1	4.25E−03	1.308
	O-linked N-acetylglucosamine (GlcNAc) transferase (UDP-N-acetylglucosamine:polypeptide-N-acetylglucosaminyl transferase)	OGT	4.28E−03	−1.281
	A kinase (PRKA) anchor protein 13	AKAP13	4.28E−03	1.452
	heat shock 70kDa protein 8	HSPA8	4.29E−03	1.258
	glucosaminyl (N-acetyl) transferase 2, I-branching enzyme (I blood group)	GCNT2	4.30E−03	1.56
	inositol hexakisphosphate kinase 2	IP6K2	4.30E−03	1.491
	MTERF domain containing 2	MTERFD2	4.32E−03	−1.350
	calcium activated nucleotidase 1	CANT1	4.33E−03	−1.416
	phosphopantothenoylcysteine synthetase	PPCS	4.35E−03	−1.426
	major histocompatibility complex, class I, C	HLA-C	4.35E−03	1.123
	Ras-related associated with diabetes	RRAD	4.35E−03	2.33
	phytanoyl-CoA 2-hydroxylase interacting protein	PHYHIP	4.36E−03	−1.261
	polycomb group ring finger 6	PCGF6	4.37E−03	−1.557
	phosphate cytidylyltransferase 1, choline, alpha	PCYT1A	4.41E−03	1.306
	transgelin 2	TAGLN2	4.42E−03	1.9
	NAD(P)H dehydrogenase, quinone 1	NQO1	4.43E−03	1.295
	poly(A) polymerase gamma	PAPOLG	4.44E−03	−1.334
	F-box protein 21	FBXO21	4.44E−03	−1.461
	sperm specific antigen 2	SSFA2	4.45E−03	1.429
	stathmin-like 4	STMN4	4.46E−03	1.176
	F-box protein 28	FBXO28	4.47E−03	1.252
	topoisomerase (DNA) II binding protein 1	TOPBP1	4.48E−03	−1.485
	DnaJ (Hsp40) homolog, subfamily C, member 3	DNAJC3	4.49E−03	1.562
	protein arginine methyltransferase 6	PRMT6	4.49E−03	−1.469
	bromodomain containing 3	BRD3	4.50E−03	−1.205
	OTU domain, ubiquitin aldehyde binding 2	OTUB2	4.51E−03	−1.291
	Rho guanine nucleotide exchange factor (GEF) 7	ARHGEF7	4.51E−03	−1.126
	inner membrane protein, mitochondrial	IMMT	4.51E−03	−1.316
	SH3-domain GRB2-like endophilin B1	SH3GLB1	4.54E−03	1.324
	salt-inducible kinase 2	SIK2	4.54E−03	1.681
	RIKEN cDNA B630019K06 gene	B630019K06Rik	4.55E−03	1.663
	D site of albumin promoter (albumin D-box) binding protein	DBP	4.56E−03	−1.401
	mediator complex subunit 8	MED8	4.56E−03	1.436
	G protein regulated inducer of neurite outgrowth 1	GPRIN1	4.57E−03	−1.425
	heterogeneous nuclear ribonucleoprotein A2/B1	HNRNPA2B1	4.57E−03	1.575
	SEC16 homolog A (S. cerevisiae)	SEC16A	4.59E−03	−1.211
	CREB/ATF bZIP transcription factor	CREBZF	4.59E−03	1.506
	transformer 2 alpha homolog (Drosophila)	TRA2A	4.60E−03	1.573
	dual specificity phosphatase 2	DUSP2	4.61E−03	1.94
	zinc finger and BTB domain containing 8A	ZBTB8A	4.61E−03	−1.278
	protein phosphatase 2, regulatory subunit B, delta	PPP2R2D	4.61E−03	1.241
	CXXC finger protein 1	CXXC1	4.64E−03	1.633
	transmembrane protein 109	TMEM109	4.65E−03	−1.368
