# Supplementary material for: Transcriptional analysis of rat piriform cortex following exposure to the organophosphonate anticholinesterase sarin and induction of seizures
Source: J Neuroinflammation. 2011 Jul 21;8:83. doi: 10.1186/1742-2094-8-83 (PMC3199787; doi:10.1186/1742-2094-8-83)
Supplement: Additional file 13 — Significant canonical pathways identified 0.25 h after seizure onset in piriform cortex. The top ≤ 800 molecules from the dataset that met the p-value cutoff (≤ 0.05) and were associated with a canonical pathway in IPA's Knowledge Base were considered for the analysis. The significance value for each canonical pathway was calculated using right-tailed Fisher's exact test and is expressed as -log (p-value), so values greater than 1.3 indicate significance. [file 1742-2094-8-83-S13.XLS]

## Sheet: Sheet0
Significant canonical pathways identified 0.25 h after seizure onset in piriform cortex
Canonical Pathways	-log(p-value)
Inositol Metabolism	2.73
Acute Phase Response Signaling	2.56
Hepatic Fibrosis / Hepatic Stellate Cell Activation	2.29
Tight Junction Signaling	2.18
Selenoamino Acid Metabolism	1.94
Hepatic Cholestasis	1.94
D-glutamine and D-glutamate Metabolism	1.75
Role of Macrophages, Fibroblasts and Endothelial Cells in Rheumatoid Arthritis	1.6
Interferon Signaling	1.54
Chondroitin Sulfate Biosynthesis	1.51
IL-10 Signaling	1.51
Phospholipid Degradation	1.49
PPAR Signaling	1.48
Nitrogen Metabolism	1.44
Colorectal Cancer Metastasis Signaling	1.41
Tryptophan Metabolism	1.39
Glutamate Receptor Signaling	1.35
Androgen and Estrogen Metabolism	1.32
RAR Activation	1.3
