# Supplementary material for: Transcriptional analysis of rat piriform cortex following exposure to the organophosphonate anticholinesterase sarin and induction of seizures
Source: J Neuroinflammation. 2011 Jul 21;8:83. doi: 10.1186/1742-2094-8-83 (PMC3199787; doi:10.1186/1742-2094-8-83)
Supplement: Additional file 18 — Top 25 biological functions affected in piriform cortex from 0.25 h to 24 h after seizure onset. [file 1742-2094-8-83-S18.XLS]

## Sheet: Sheet0
Top 25 biological functions affected in piriform cortex from 0.25 h to 24 h after seizure onset
Category	-log (p-value)
Cellular Movement	13.75 - 2.82
Cellular Growth and Proliferation	12.46 - 2.84
Inflammatory Response	12.23 - 2.84
Cell Death	10.75 - 2.84
Endocrine System Disorders	9.82 - 3.67
Metabolic Disease	9.82 - 3.67
Connective Tissue Disorders	9.31 - 3.31
Cellular Development	9.03 - 2.81
Inflammatory Disease	8.79 - 3.26
Skeletal and Muscular Disorders	8.79 - 3.31
Cell Morphology	8.32 - 2.89
Hematological System Development and Function	8.02 - 2.81
Immune Cell Trafficking	8.02 - 2.82
Immunological Disease	7.23 - 2.84
Gene Expression	6.81 - 2.94
Tissue Morphology	6.79 - 2.97
Cell-To-Cell Signaling and Interaction	6.69 - 2.95
Embryonic Development	6.58 - 2.94
Connective Tissue Development and Function	6.40 - 3.00
Reproductive System Disease	6.38 - 3.17
Cancer	6.26 - 2.94
Tissue Development	5.98 - 2.82
Skeletal and Muscular System Development and Function	5.94 - 2.92
Organismal Injury and Abnormalities	5.83 - 2.94
Hematological Disease	5.73 - 2.83
