# Supplementary material for: Transcriptional analysis of rat piriform cortex following exposure to the organophosphonate anticholinesterase sarin and induction of seizures
Source: J Neuroinflammation. 2011 Jul 21;8:83. doi: 10.1186/1742-2094-8-83 (PMC3199787; doi:10.1186/1742-2094-8-83)
Supplement: Additional file 19 — Significant canonical pathways affected in piriform cortex from 0.25 h to 24 h after seizure onset. [file 1742-2094-8-83-S19.XLS]

## Sheet: Sheet0
Significant canonical pathways affected in piriform cortex from 0.25 h to 24 h after seizure onset
Canonical Pathways	-log(p-value)
IL-6 Signaling	6.94
IL-10 Signaling	6.19
TREM1 Signaling	4.83
MIF Regulation of Innate Immunity	4.05
Type I Diabetes Mellitus Signaling	3.95
p38 MAPK Signaling	3.85
Toll-like Receptor Signaling	3.61
Acute Phase Response Signaling	3.51
Neuropathic Pain Signaling In Dorsal Horn Neurons	3.41
ILK Signaling	3.14
Role of Pattern Recognition Receptors in Recognition of Bacteria and Viruses	3.11
LXR/RXR Activation	3.02
Phospholipid Degradation	3.02
T Helper Cell Differentiation	2.83
Dendritic Cell Maturation	2.81
Hepatic Fibrosis / Hepatic Stellate Cell Activation	2.72
Fcγ Receptor-mediated Phagocytosis in Macrophages and Monocytes	2.61
Role of Macrophages, Fibroblasts and Endothelial Cells in Rheumatoid Arthritis	2.42
NRF2-mediated Oxidative Stress Response	2.41
CD40 Signaling	2.34
LPS-stimulated MAPK Signaling	2.28
Altered T Cell and B Cell Signaling in Rheumatoid Arthritis	2.2
Cholecystokinin/Gastrin-mediated Signaling	2.18
IL-17 Signaling	2.11
Neurotrophin/TRK Signaling	2.11
cAMP-mediated Signaling	2.06
Role of PKR in Interferon Induction and Antiviral Response	2.03
HMGB1 Signaling	1.92
Glycerophospholipid Metabolism	1.91
G-Protein Coupled Receptor Signaling	1.88
PPAR Signaling	1.88
ERK/MAPK Signaling	1.84
EGF Signaling	1.83
Graft-versus-Host Disease Signaling	1.7
Production of Nitric Oxide and Reactive Oxygen Species in Macrophages	1.7
Hepatic Cholestasis	1.67
FGF Signaling	1.66
CD27 Signaling in Lymphocytes	1.66
PPARα/RXRα Activation	1.65
LPS/IL-1 Mediated Inhibition of RXR Function	1.62
Systemic Lupus Erythematosus Signaling	1.61
Taurine and Hypotaurine Metabolism	1.54
ATM Signaling	1.53
IL-15 Production	1.53
Endoplasmic Reticulum Stress Pathway	1.53
HGF Signaling	1.51
Prolactin Signaling	1.5
Relaxin Signaling	1.48
Melatonin Signaling	1.45
Actin Cytoskeleton Signaling	1.4
Notch Signaling	1.4
Erythropoietin Signaling	1.4
PDGF Signaling	1.4
Cardiac Hypertrophy Signaling	1.39
Tight Junction Signaling	1.38
IL-12 Signaling and Production in Macrophages	1.37
Colorectal Cancer Metastasis Signaling	1.37
Protein Kinase A Signaling	1.35
GNRH Signaling	1.35
4-1BB Signaling in T Lymphocytes	1.3
